# Supplementary material for: A system dynamic model to quantify the impacts of water resources allocation on water–energy–food–society (WEFS) nexus
Source: Copernicus journal article supplement (doi:10.5194/hess-26-3965-2022), 2022-08-02
Supplement: Supplementary file 1 [file hess-26-3965-2022-supplement.pdf]

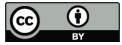

*Supplement of*

**A system dynamic model to quantify the impacts of water resources allocation on water–energy–food–society (WEFS) nexus**

**Yujie Zeng et al.**

*Correspondence to:* Dedi Liu ([dediliu@whu.edu.cn](mailto:dediliu@whu.edu.cn))

The copyright of individual parts of the supplement might differ from the article licence.

1 **Table S1 Characteristics of the seventeen reservoirs (million m<sup>3</sup>).**

| No. | Name          | Total    | Storage at normal | Dead     | Storage at flood limiting |
|-----|---------------|----------|-------------------|----------|---------------------------|
|     |               | storage  | water level       | storage  | water level               |
| R1  | Sanliping     | 510.0    | 211.0             | 261.0    | 389.0/468.5               |
| R2  | Siping        | 269.0    | 247.0             | 10.2     | 127.0                     |
| R3  | Danjiangkou   | 33,910.0 | 29,050.0          | 12,690.0 | 22,910.0/25,790.0         |
| R4  | Mengqiaochuan | 110.3    | 88.2              | 2.7      | 90.9                      |
| R5  | Huayanghe     | 107.0    | 70.8              | 1.4      | 72.2                      |
| R6  | Xionghe       | 195.9    | 115.9             | 20.0     | 135.9                     |
| R7  | Xipaizihe     | 220.4    | 122.0             | 2.2      | 124.2                     |
| R8  | Hongshuihe    | 103.6    | 58.9              | 5.4      | 64.3                      |
| R9  | Shimenji      | 154.0    | 114.7             | 1.9      | 99.0                      |
| R10 | Sandaohe      | 154.6    | 127.4             | 0.0      | 127.4                     |
| R11 | Yuntaishan    | 123.0    | 89.0              | 5.0      | 89.0                      |
| R12 | Yinghe        | 121.6    | 76.3              | 3.6      | 79.9                      |
| R13 | Huangpi       | 125.6    | 70.3              | 10.1     | 63.6                      |
| R14 | Wenxiakou     | 520.0    | 269.0             | 176.0    | 388.0                     |
| R15 | Shimen        | 159.1    | 68.6              | 13.0     | 81.6                      |
| R16 | Gaoguan       | 201.1    | 154.3             | 30.9     | 145.9                     |
| R17 | Huiting       | 313.4    | 173.5             | 32.50    | 206.0                     |

2

3 **Table S2 Calibrated parameters for the WEFS model.**

| Notation | Description | Unit | Value |
|----------|-------------|------|-------|
|----------|-------------|------|-------|

|                               |                                                                                                               |     |              |
|-------------------------------|---------------------------------------------------------------------------------------------------------------|-----|--------------|
| $\kappa_P, \varphi_P$         | Auxiliary parameters for population evolution                                                                 | [-] | 1.0, 0.0856  |
| $\kappa_G, \varphi_G$         | Auxiliary parameters for GDP evolution                                                                        | [-] | 3.3, 0.0856  |
| $\kappa_{CA}, \varphi_{CA}$   | Auxiliary parameters for crop area evolution                                                                  | [-] | 6.0, 0.0856  |
| $\kappa_{qu}, \varphi_{qu}$   | Auxiliary parameters for water use quota simulation                                                           | [-] | 3.8, 0.0856  |
| $\kappa_e, \varphi_e$         | Auxiliary parameters for energy use quota evolution                                                           | [-] | 15.0, 0.0856 |
| $\kappa_{pro}, \varphi_{pro}$ | Auxiliary parameters for crop yield evolution                                                                 | [-] | 24.5, 0.0856 |
| $\eta_W$                      | Perception factors describing the community's ability to identify the threats of degradation in water system  | [-] | 450          |
| $\eta_E$                      | Perception factors describing the community's ability to identify the threats of degradation in energy system | [-] | 50           |
| $\eta_F$                      | Perception factors describing the community's ability to identify the threats of degradation in food system   | [-] | 120          |
| $\theta_W$                    | Accumulation factor for water shortage awareness                                                              | [-] | 0.0856       |
| $\theta_E$                    | Accumulation factor for energy shortage awareness                                                             | [-] | 0.0856       |
| $\theta_F$                    | Accumulation factor for food shortage awareness                                                               | [-] | 0.0856       |
| $\omega_W$                    | Lapse factor for water shortage awareness                                                                     | [-] | 0.1          |
| $\omega_E$                    | Lapse factor for energy shortage awareness                                                                    | [-] | 0.1          |
| $\omega_F$                    | Lapse factor for food shortage awareness                                                                      | [-] | 0.1          |
| $WSR_{crit}$                  | Critical water shortage rate                                                                                  | [-] | 0.07         |
| $ESR_{crit}$                  | Critical energy shortage rate                                                                                 | [-] | 0.05         |
| $FSR_{crit}$                  | Critical food shortage rate                                                                                   | [-] | 0.05         |
| $FA_{crit}$                   | Critical food shortage awareness                                                                              | [-] | 1.5          |

|                 |                                                                                |     |        |
|-----------------|--------------------------------------------------------------------------------|-----|--------|
| $E_{crit}$      | Critical environmental awareness                                               | [-] | 8      |
| $\zeta_1$       | Auxiliary factors for feedback on population                                   | [-] | 0.0856 |
| $\zeta_2$       | Auxiliary factors for feedback on GDP                                          | [-] | 0.0856 |
| $\zeta_3^E$     | Auxiliary factors for feedback on crop area by E                               | [-] | 0.0856 |
| $\zeta_3^F$     | Auxiliary factors for feedback on crop area by FA                              | [-] | 0.0856 |
| $\delta_{rp}^E$ | Factor describing feedback capability of environmental awareness to population | [-] | 0.005  |
| $\delta_{rg}^E$ | Factor describing feedback capability of environmental awareness to GDP        | [-] | 0.05   |
| $\delta_{ra}^E$ | Factors describing feedback capability of environmental awareness to crop area | [-] | 0.03   |
| $\delta_{ra}^F$ | Factors describing feedback capability of food shortage awareness to crop area | [-] | 0.1    |

4

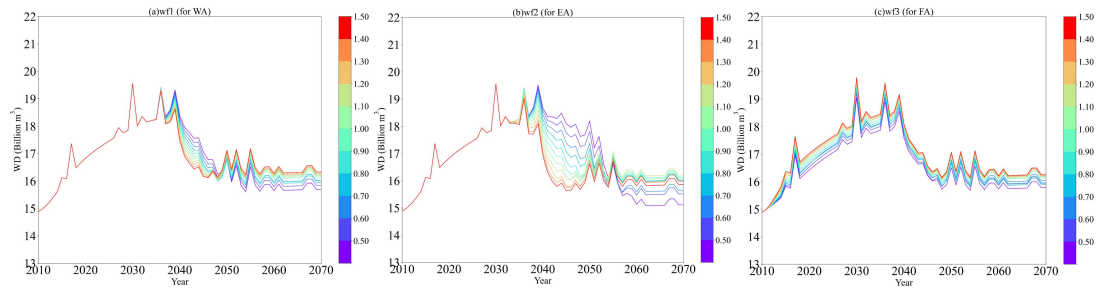

5

6 **Figure S1. Trajectories of water demand with varied shortage awareness weight factors.**

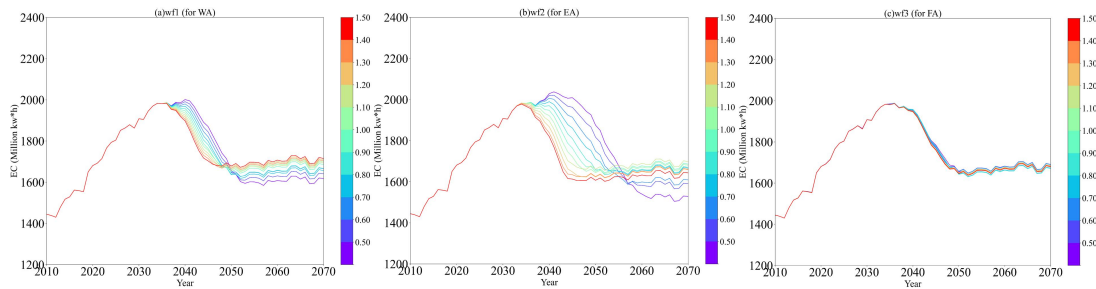

7

8 **Figure S2. Trajectories of energy consumption with varied shortage awareness weight**  
 9 **factors.**

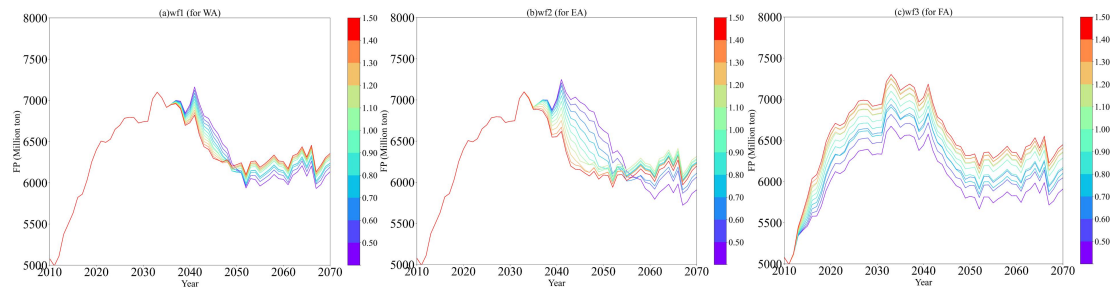

10

11 **Figure S3. Trajectories of food production with varied shortage awareness weight factors.**

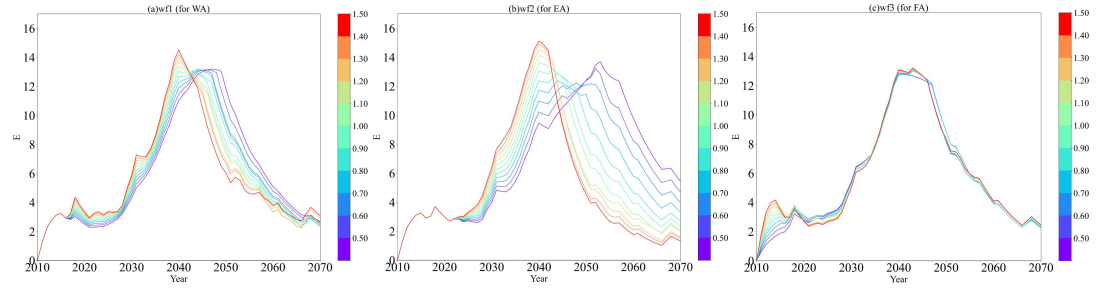

12

13 **Figure S4. Trajectories of environmental awareness with varied shortage awareness weight**  
 14 **factors.**
